# Supplementary material for: Adult vitamin D deficiency disrupts hippocampal-dependent learning and structural brain connectivity in BALB/c mice
Source: Springer Nature journal article supplement (doi:10.1007/s00429-019-01840-w), 2019-02-02
Supplement: MOESM8 [file 16439346]

**Supplementary Results**

**
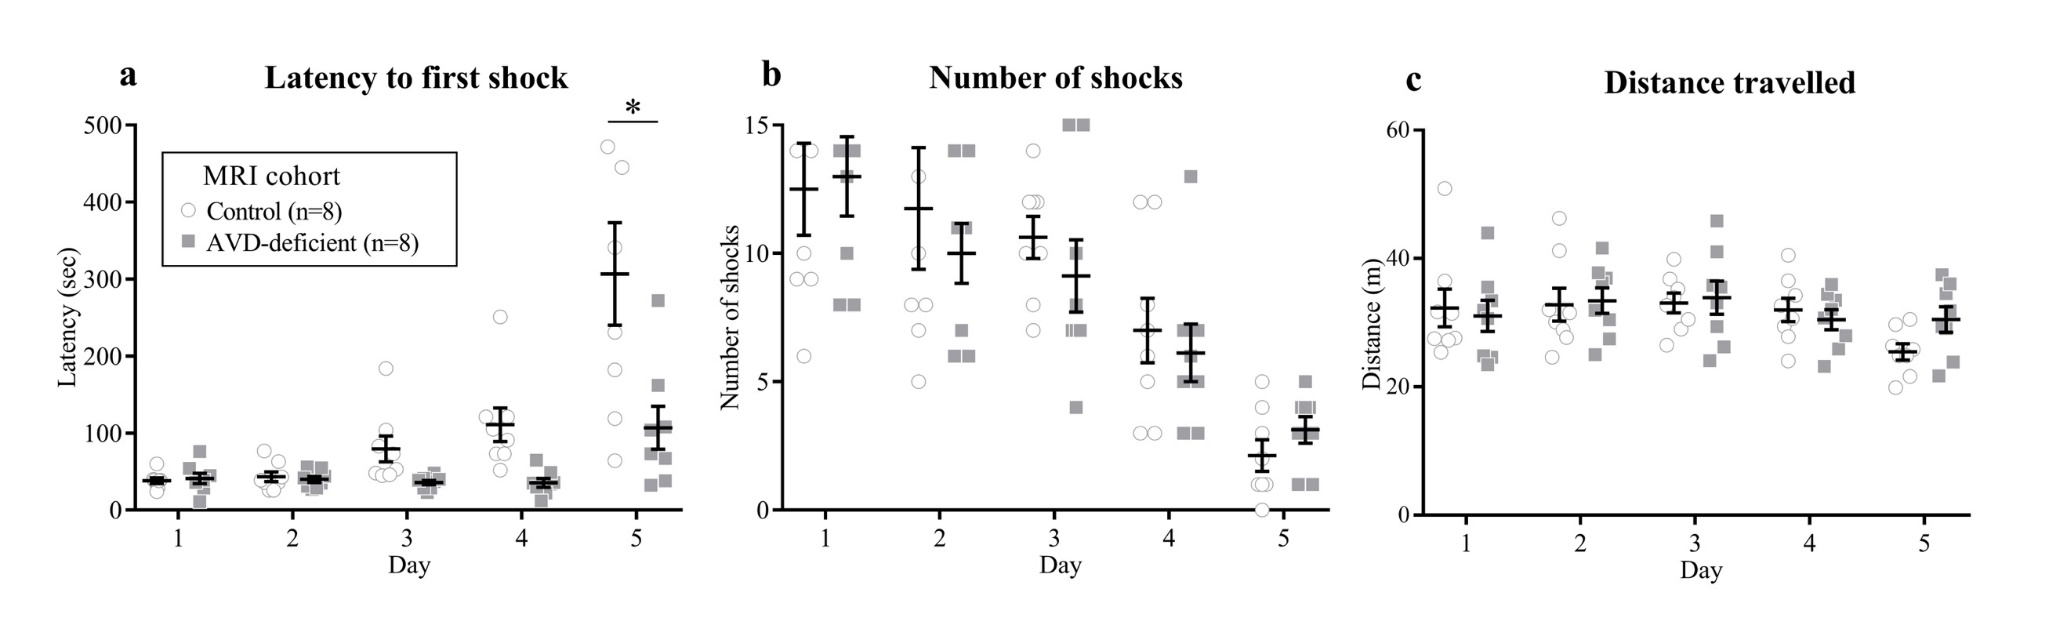
**

**Supplementary Fig. 1.** Individual data plots of active place avoidance test results. The groups were control and AVD-deficient BALB/c mice. AVD-deficient mice had a lower latency to first shock (a), received the same number of shocks (b) and travelled a similar distance (c) throughout the sessions of an active place avoidance test. The horizontal axis represents different days of testing sessions. We conducted repeated measure ANOVA to measure the main effect of Diet and Day on the spatial learning test parameters. Values are means ± SEM, *n* = 8/group. **p* < 0.05 compared with the control diet group.


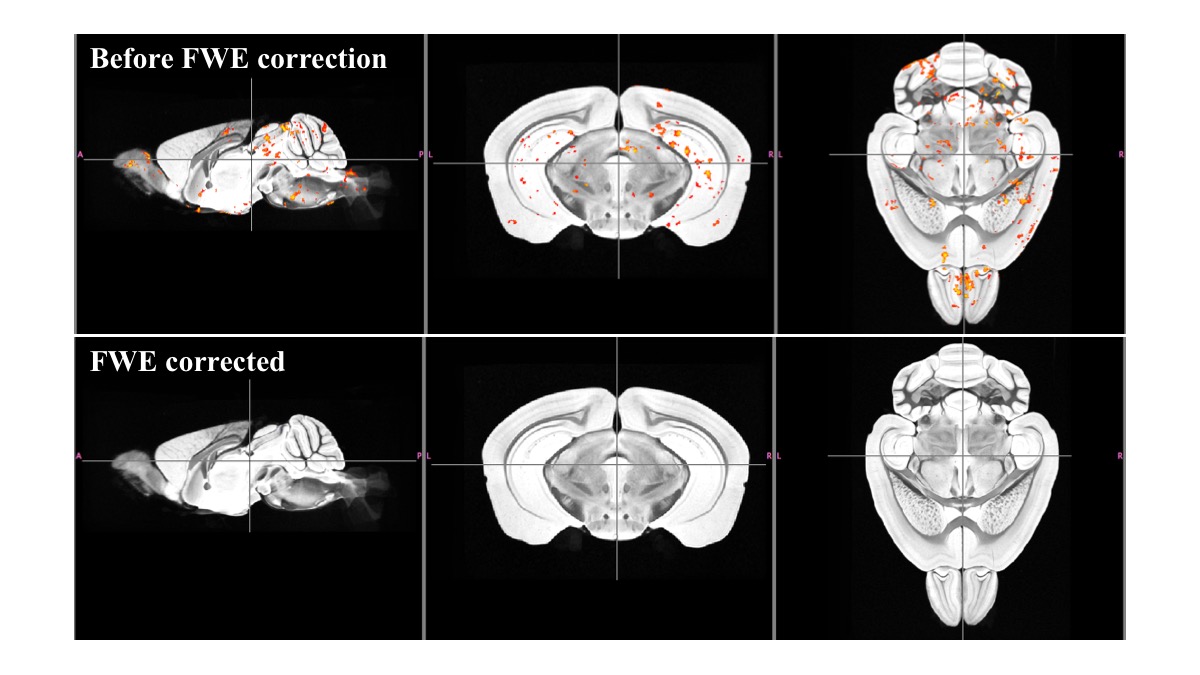


**Supplementary Fig. 2.** Voxel based morphometric (VBA) analysis showed that the vitamin D deficiency does not cause morphometric brain alteration in BALB/c mice. Two contrasts were used to determine structural changes (control > vitamin D deficient; vitamin D-deficient < control). The result showed contrast between “control > vitamin D deficient”. The opposite contrast (vitamin D-deficient < control) analysis did not show any voxel. Family wise error (FWE) rate not corrected (Top), and corrected (Bottom) at a significance level of 0.05. FSL based FDR program was used to correct family wise error rate.

**
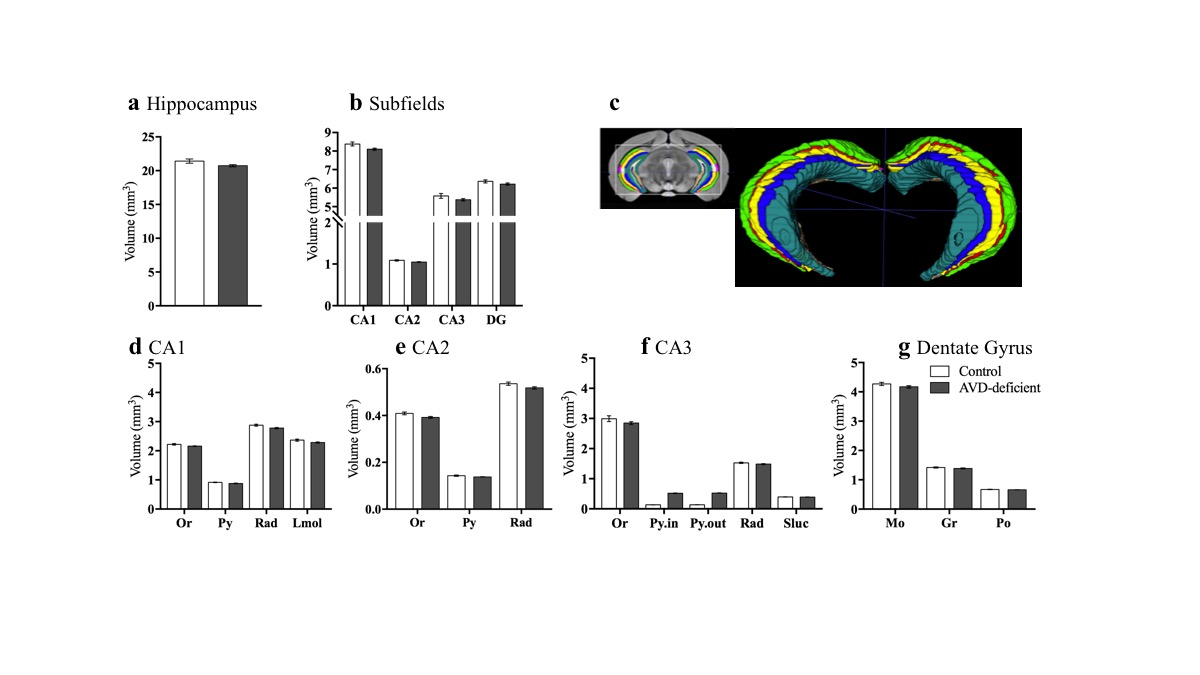
**

**Supplementary Fig. 3.** Effect of Diet on hippocampal volume in the control and AVD-deficient BALB/c mice. Horizontal and vertical axis represents specific region and volume (mm3) respectively. a. Total hippocampal volume; b. Hippocampal subfields; c. example of a segmented hippocampus in coronal view and a 3D view. Cell layers of CA1 (d), CA2 (e), CA3 (f), and dentate gyrus (g). Cell layers are Or (oriens), Py (Pyramidal), Rad (Radiatum), Lmol (Lacunosum), Sluc (Stratum lucidum), Mo (Molecular), Gr (Granular) and Po (Polymorphic). We conducted one-way ANOVA to measure the main effect of Diet on the structural volume changes in the hippocampal subfields. The Diet groups were control and vitamin D deficient group. Values are means ± SEM, *n* = 8 per group. **p* < 0.05 and #*p* < 0.06 compared with the control diet group.


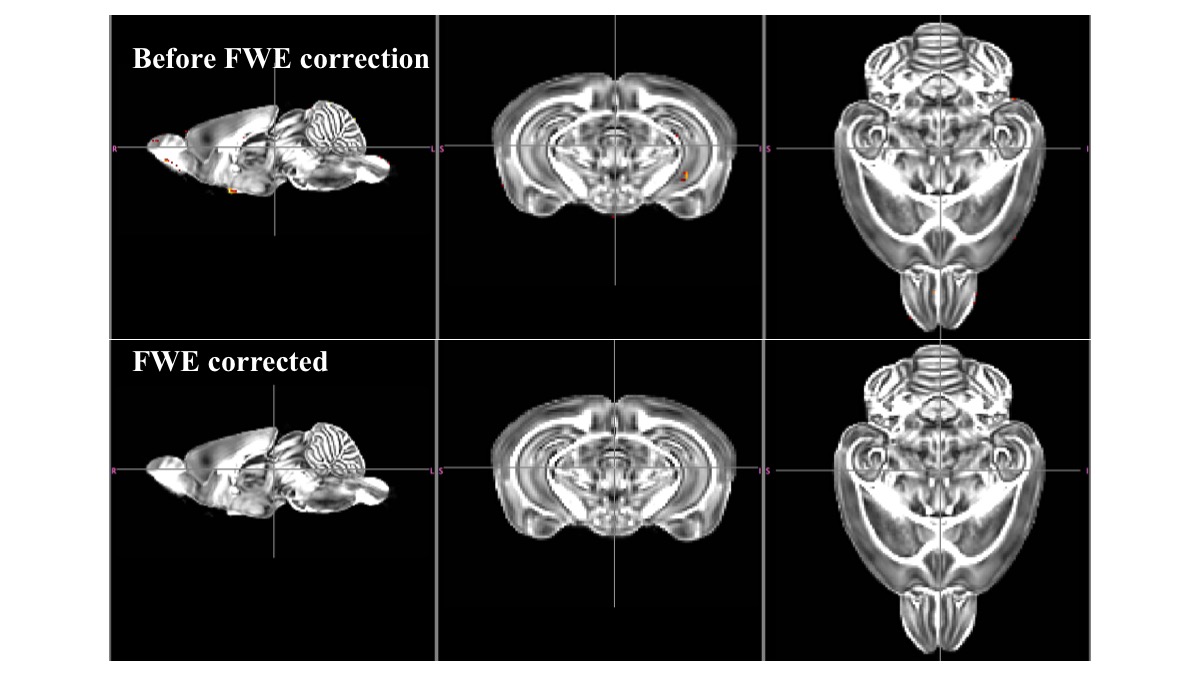


**Supplementary Fig. 4.** Voxel based morphometric (VBA) analysis showed that the vitamin D deficiency did not cause alterations of Fractional anisotropy (FA) in BALB/c mice brain. Two contrasts were used to determine FA changes (control > vitamin D deficient; vitamin D-deficient < control). The result showed contrast between “control > vitamin D deficient”. The opposite contrast (vitamin D-deficient < control) analysis did not show any voxel. Family wise error (FWE) rate not corrected (Top), and corrected (Bottom) at a significance level of 0.05. FSL based FDR program was used to correct family wise error rate.


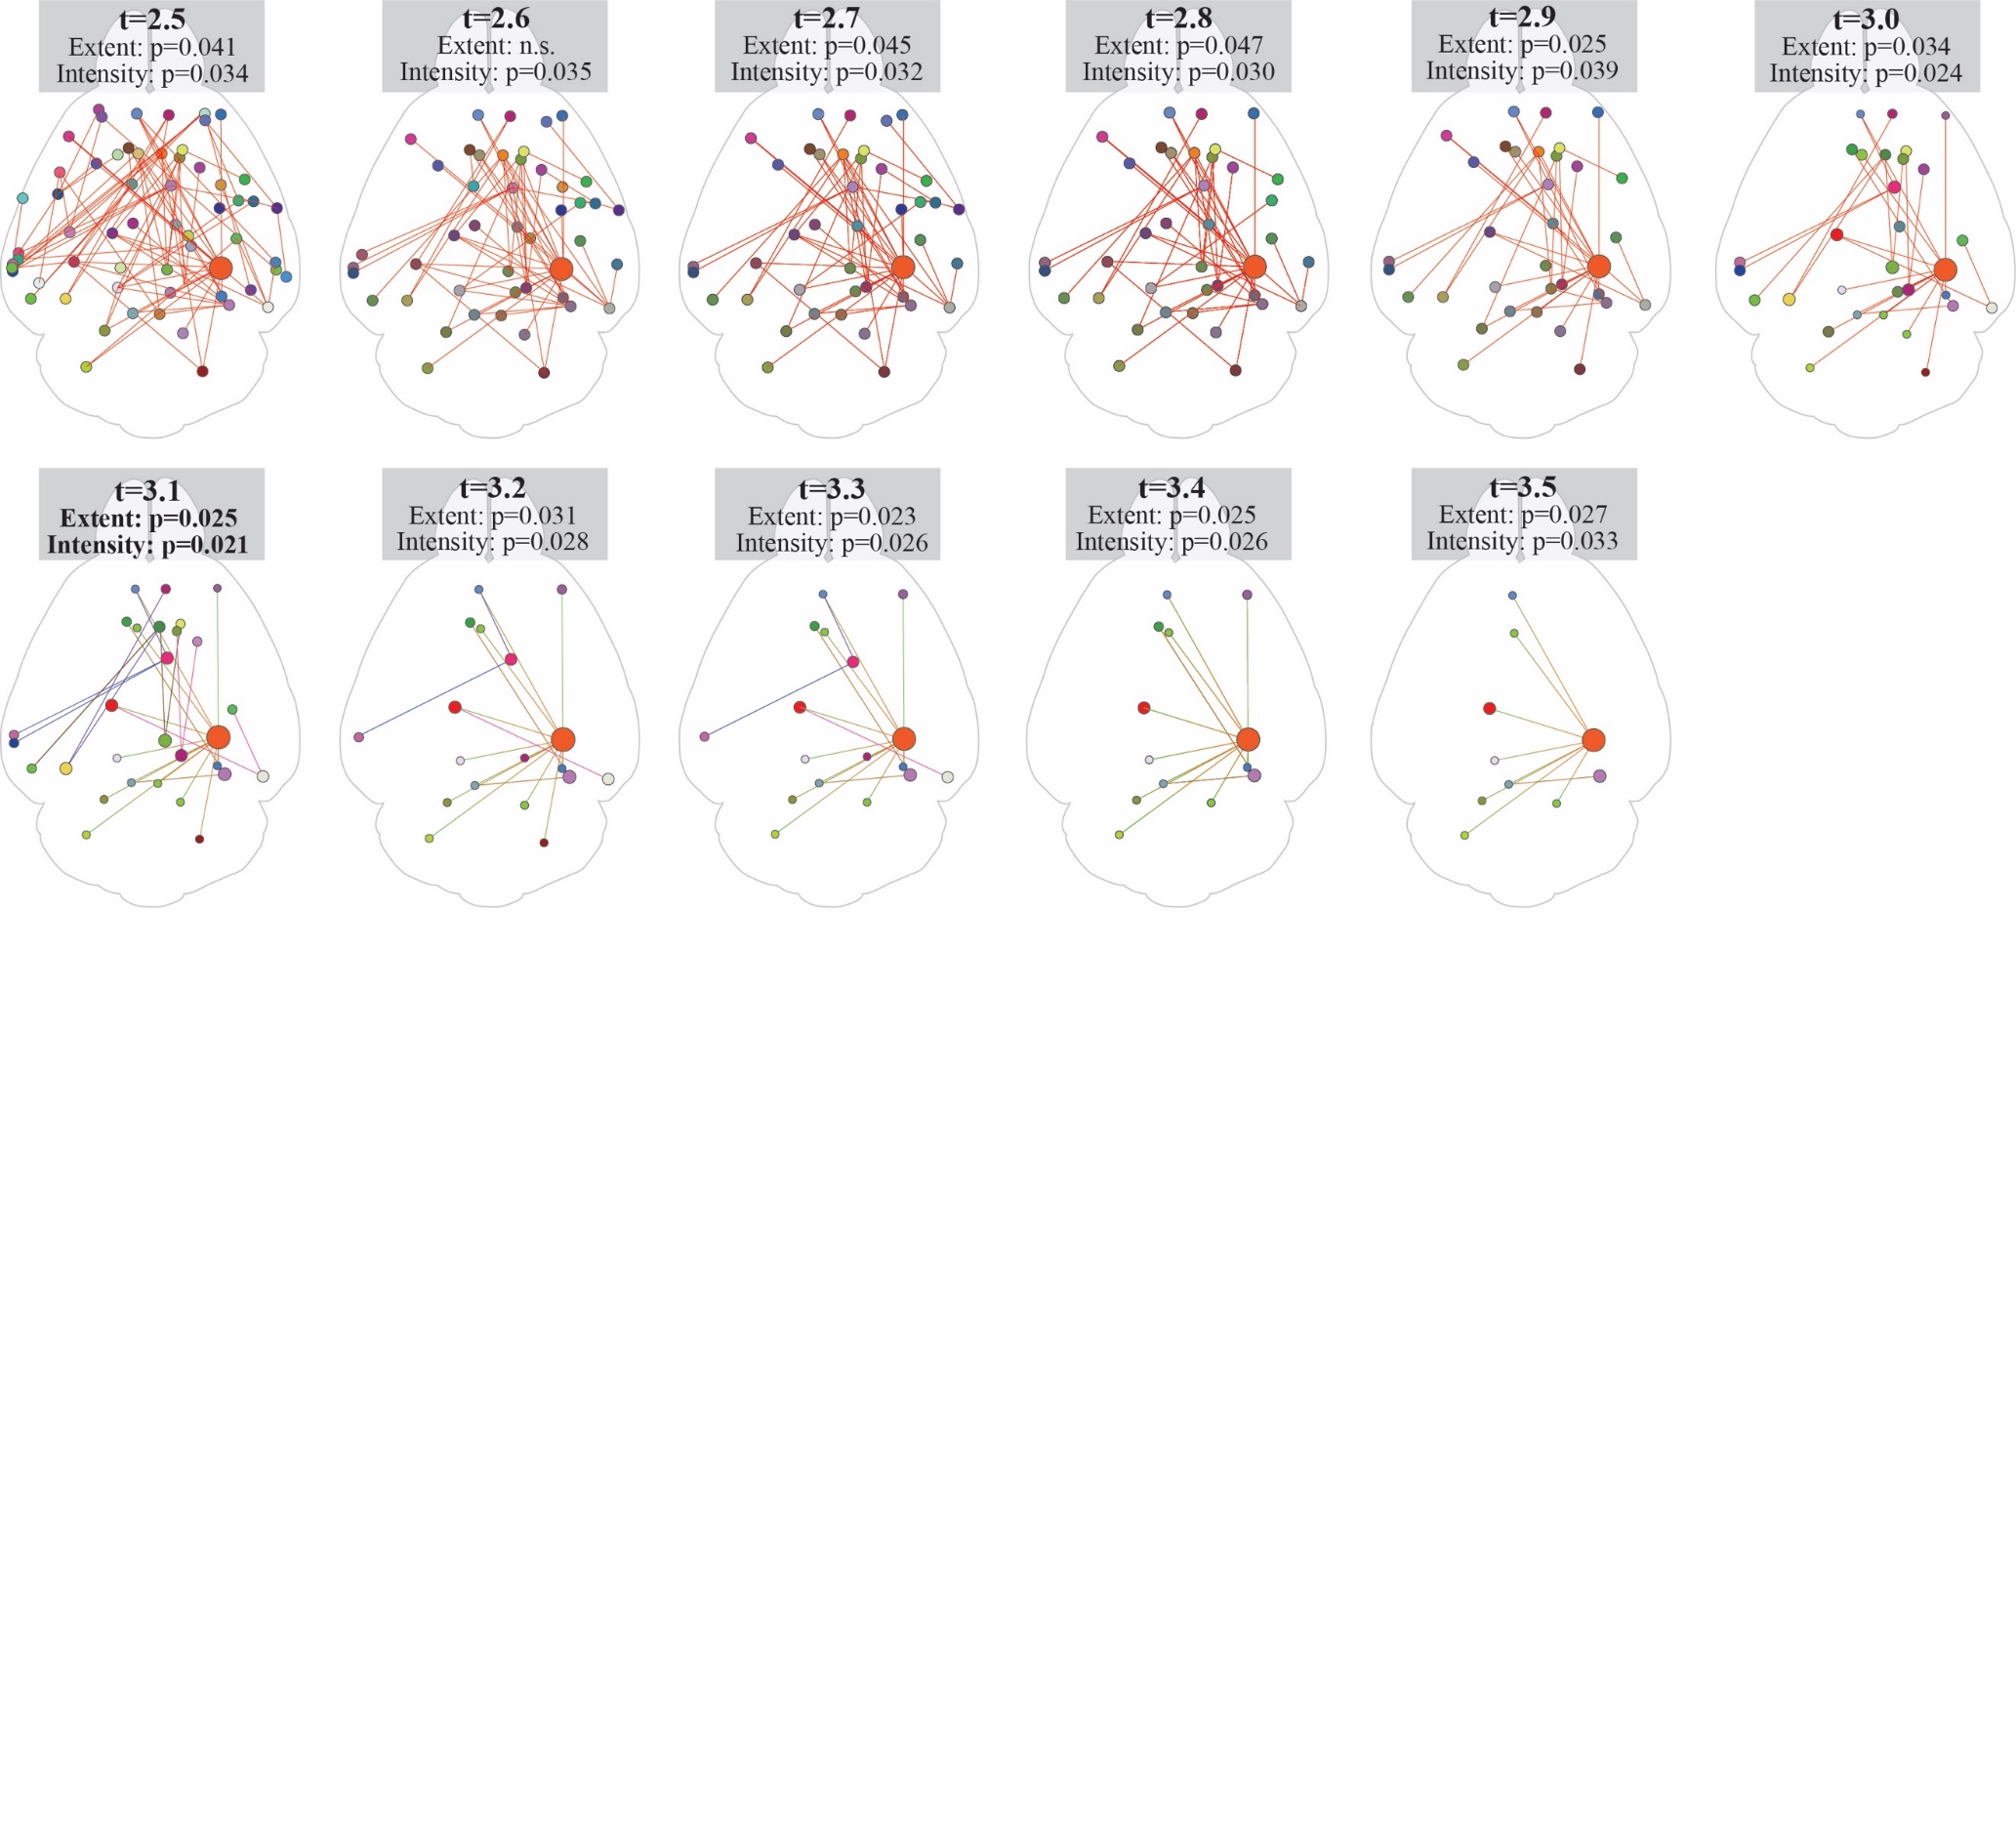


**Supplementary Fig. 5.** Network Based Statistics (NBS) analysis under a range of thresholds. We examined the 76 x76 connectivity matrix using a primary threshold ranging from *t* = 2.5 to *t* = 3.5 for permutation testing. The results of threshold 3.1 produces highest statistical significance result in terms of network extent and intensity. Two contrasts were used to determine network disruption (control > vitamin D deficient; vitamin D-deficient < control). The result showed contrast between “control > vitamin D deficient”. The opposite contrast (vitamin D-deficient < control) analysis did not show significant network.


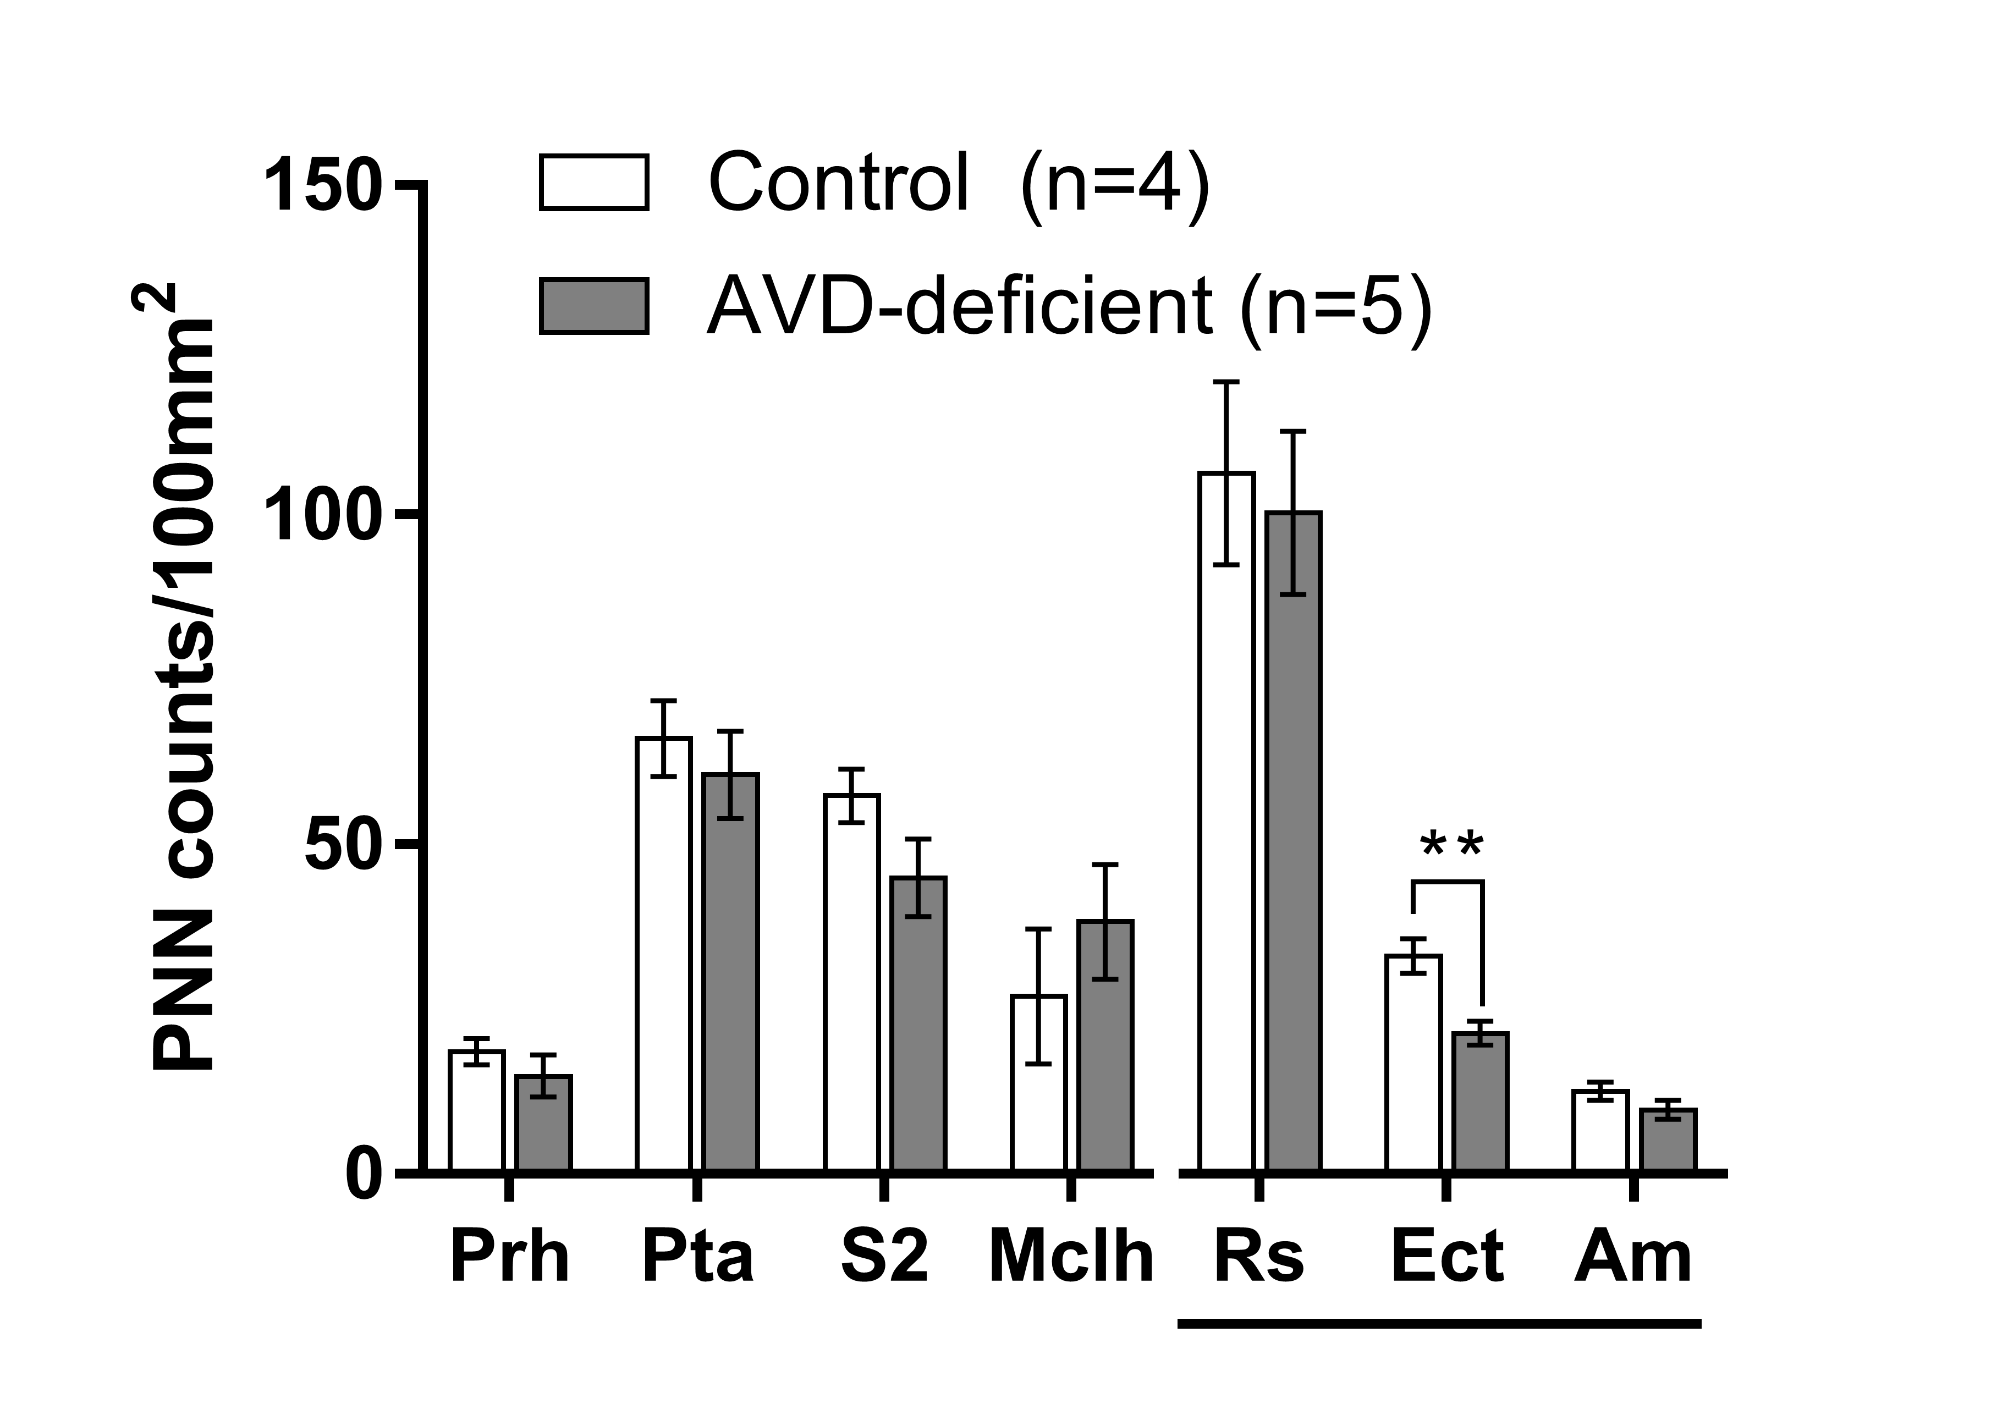


**Supplementary Fig. 6.** We quantified WFA labelled perineuronal nets (PNN) in three additional nodes under the disrupted network (Solid underline; Rs, Ect, Am) and four regions (Prh, Pta, S2, Mclh) that were outside of the disrupted network. Except Ect the PNN expression remained the same in these brain regions. Rs (retrosplenial cortex), Ect (ectorhinal cortex), Am (amygdala), Pta (parietal association cortex), Prh (perirhinal cortex), S2 (secondary motor cortex) and Mclh (magnocellular nucleus of the lateral hypothalamus). Vertical axis indicates PNN count in 100 mm2 tissue. Horizontal axis represents specific brain regions. We conducted t-test to measure the difference between control and AVD-deficient mice. Values are means ± SEM, *n* = 4/5 per group. **p* < 0.05 compared with the control diet group.
